# Supplementary material for: Thermal–optical analysis of quartz fiber filters loaded with snow samples – determination of iron based on interferences caused by mineral dust
Source: Copernicus journal article supplement (doi:10.5194/amt-15-5207-2022), 2022-09-15
Supplement: Supplementary file 1 [file amt-15-5207-2022-supplement.pdf]

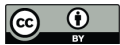

*Supplement of*

## **Thermal–optical analysis of quartz fiber filters loaded with snow samples – determination of iron based on interferences caused by mineral dust**

**Daniela Kau et al.**

*Correspondence to:* Daniela Kau ([daniela.kau@tuwien.ac.at](mailto:daniela.kau@tuwien.ac.at))

The copyright of individual parts of the supplement might differ from the article licence.

**Table S1: Temperature set points and residence times of the EUSAAR2 protocol used for thermal-optical analysis with the Lab OC-EC Aerosol Analyzer (Sunset Laboratory Inc.).**

| Step                | Temperature (°C) | Duration (s) |
|---------------------|------------------|--------------|
| He 1                | 200              | 120          |
| He 2                | 300              | 150          |
| He 3                | 450              | 180          |
| He 4                | 650              | 180          |
| He 5*               | 1                | 30           |
| He/O <sub>2</sub> 1 | 500              | 120          |
| He/O <sub>2</sub> 2 | 550              | 120          |
| He/O <sub>2</sub> 3 | 700              | 70           |
| He/O <sub>2</sub> 4 | 850              | 80           |
| CalibrationOx       | 1                | 110          |

\*EUSAAR2 includes a cooling step (He 5) before switching to an oxidizing atmosphere

15

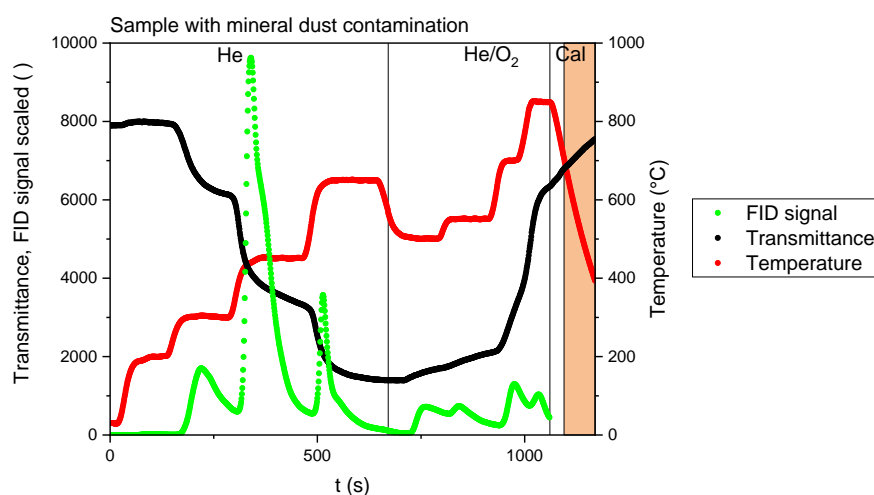

**Figure S1: Thermogram of a sample containing MD.**

The FID signal (green) shows higher amounts of OC in the sample than EC. The high FID signal caused by the calibration gas at the end of the measurement is not shown. An automatic split point could not be set for the sample, as the transmittance (scaled to be between 1390 and 8000 a.u.) does not reach its initial value during the measurement (black line). Using the transmittance at 250°C as a reference value for the split point would not yield EC concentrations, while a split point could be set using the transmittance at 550°C.

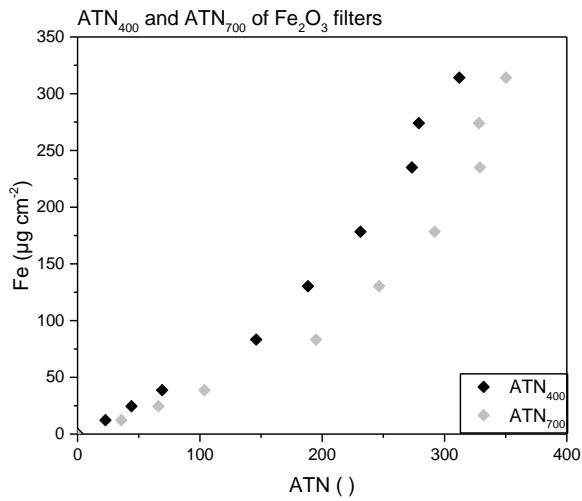

**Figure S2: Relationship of Fe loading and ATN<sub>700</sub> and ATN<sub>400</sub> of filters loaded with reference material (Fe<sub>2</sub>O<sub>3</sub>).**

25 As the transmittance values of the unloaded quartz fiber filters at room temperature could not be determined retrospectively, the median transmittance of 14 unloaded blank filters (3352 a.u.) was used to approximate  $I_0$ . ATN<sub>400</sub> and ATN<sub>700</sub> relate the transmittance at the respective temperatures to this median value. The data pairs (ATN<sub>400</sub> and ATN<sub>700</sub>) determined for each Fe loading refer to the same filter and compare well, although the value of  $I_0$  is approximated. Obvious differences in the true values of  $I_0$  lead to the inconsistencies observed between the data pairs, which are more pronounced at the upper end of the curves. At low Fe loadings the relationship between ATN<sub>400</sub> and ATN<sub>700</sub> can be approximated by a linear relationship, but saturation due to artefacts related to filter effects is observed at higher loadings. This effect occurs earlier for ATN<sub>700</sub>.

30

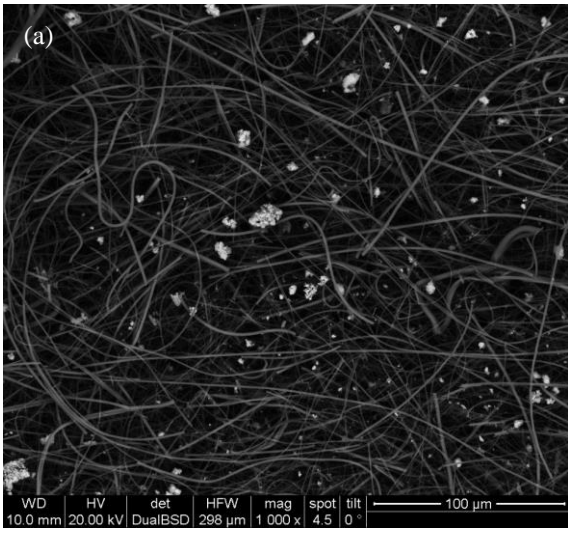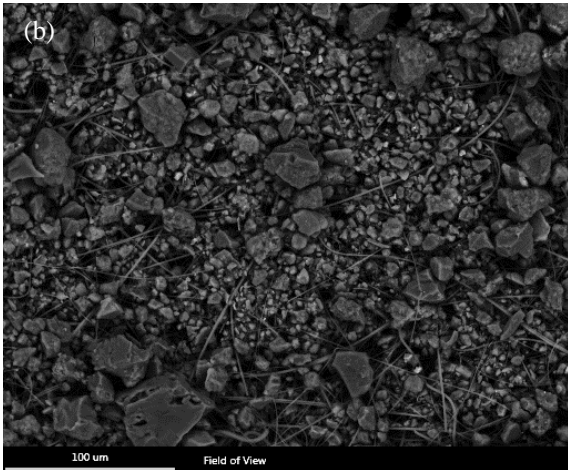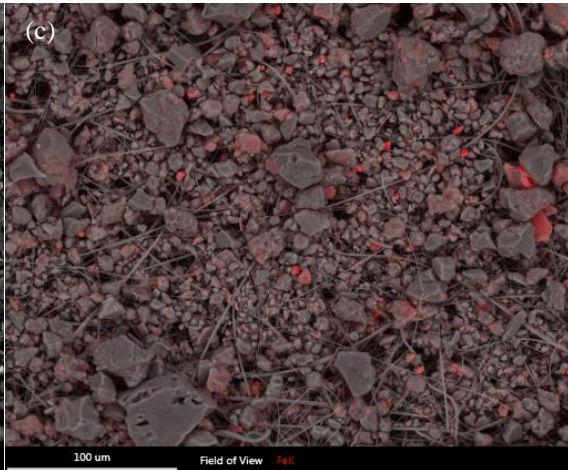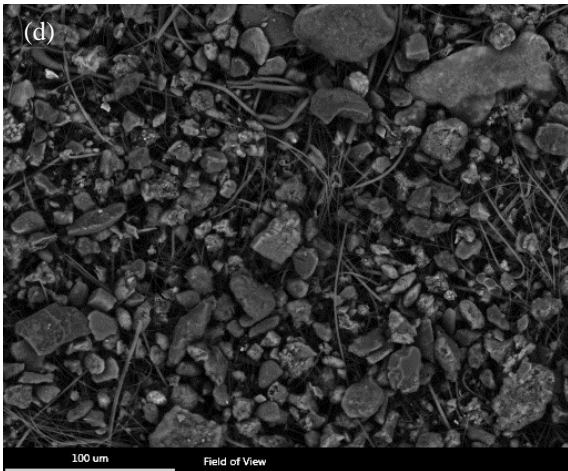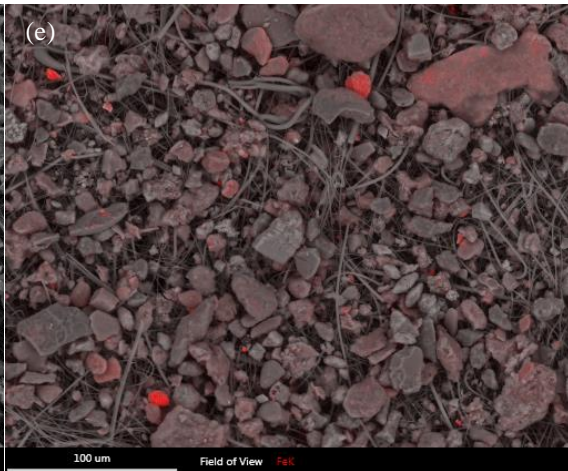

35

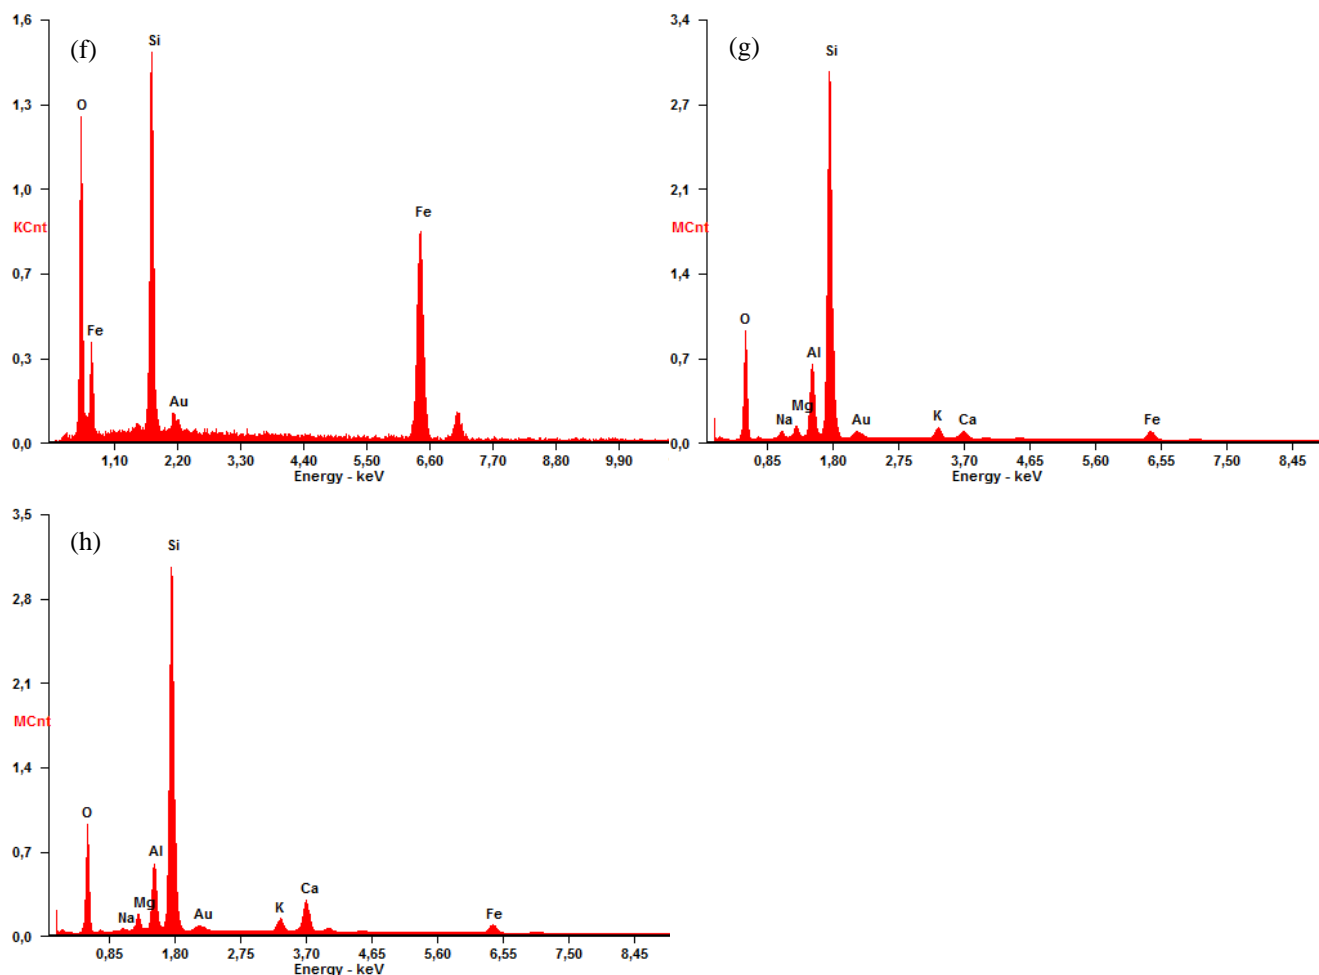

40 **Figure S3: SEM images of a quartz fiber filter loaded with reference material  $\text{Fe}_2\text{O}_3$  (a), with SRM 2709 (b) and with particles of a liquid snow sample (d). Elemental maps of Fe of these quartz fiber filters loaded with SRM 2709 (c) and with particles of a liquid snow sample (e). EDS spectra of the filters loaded with reference material  $\text{Fe}_2\text{O}_3$  (f), with SRM 2709 (g) and with particles of a liquid snow sample (h).**

The images (a), (b) and (d), recorded using backscattered electrons, show the atomic number contrast. Due to Fe's high atomic number, particles containing Fe are shown in a brighter color than the filter material or particles with different composition. Furthermore, they present an indication of particle sizes and number concentrations. The elemental maps of the filters loaded with SRM 2709 (c) and with particles of a liquid snow sample (e) show areas with high Fe concentrations colored in red. The EDS spectrum for the filter loaded with  $\text{Fe}_2\text{O}_3$  (f) shows only signals of Si, O, Fe and Au. Besides  $\text{Fe}_2\text{O}_3$ , the filter material,  $\text{SiO}_2$ , is visible in the spectrum as well as the coating of the sample, Au. The EDS spectra of the filter loaded with SRM 2709 (g) and particles of a liquid snow sample (h) show signals of Ca, K, Si, Al, MG, Na, O, Fe and Au and thus underline the occurrence of different minerals.

55

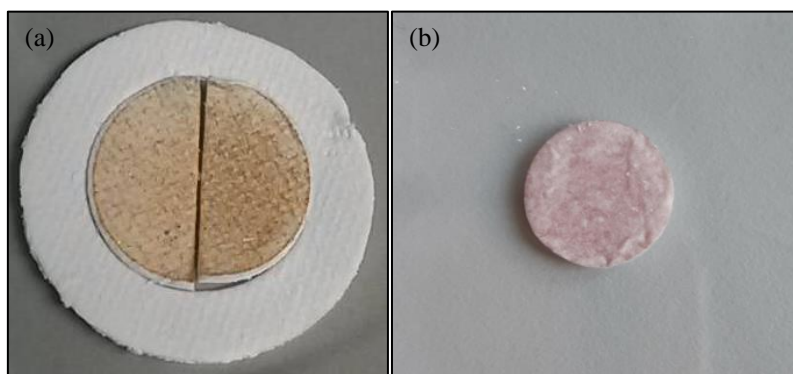

**Figure S4: Photos of a filter loaded with liquid snow containing MD (a) and a filter sampled in the railway tunnel (b) after TOA.**

Different coloring of residues remaining on the quartz fiber filters loaded with liquid snow and collected in the railway tunnel after TOA becomes visible after TOA and points to different Fe compounds.

**60 Table S2: ATN<sub>700-400</sub> and Fe concentrations of samples.**

| Sample       | ATN <sub>700-400</sub> ( ) | Fe ( $\mu\text{g cm}^{-2}$ ) | Sample                          | ATN <sub>700-400</sub> ( ) | Fe ( $\mu\text{g cm}^{-2}$ ) |
|--------------|----------------------------|------------------------------|---------------------------------|----------------------------|------------------------------|
| Snow samples |                            |                              | SRM 2709                        |                            |                              |
| Snow1        | 22.6                       | 80.3                         | SRM1                            | 2.7                        | 2.9                          |
| Snow2        | 22.6                       | 52.1                         | SRM2                            | 39.7                       | 103                          |
| Snow3        | 29.3                       | 115                          | SRM3                            | 46.3                       | 182                          |
| Snow4        | 17.4                       | 48.4                         | SRM4                            | 36.3                       | 88.7                         |
| Snow5        | 33.9                       | 200                          | SRM5                            | 41.7                       | 118                          |
| Snow6        | 28.9                       | 237                          | SRM6                            | 27.1                       | 48.6                         |
| Snow7        | 26.0                       | 83.5                         | SRM7                            | 12.2                       | 15.5                         |
| Snow8        | 34.4                       | 136                          | SRM8                            | 3.1                        | 5.9                          |
| Snow9        | 23.3                       | 270                          | SRM9                            | 33.4                       | 61.4                         |
| Snow10       | 26.6                       | 75.7                         | SRM10                           | 47.2                       | 141                          |
| Snow11       | 5.0                        | 18.7                         | Railway tunnel PM <sub>10</sub> |                            |                              |
| Snow12       | 30.4                       | 104                          | RT1                             | 5.7                        | 153                          |
| Snow13       | 33.1                       | 169                          | RT2                             | 2.7                        | 26.1                         |
| Snow14       | 25.4                       | 69.5                         | RT3                             | 4.6                        | 172                          |
| Snow15       | 11.1                       | 30.9                         | RT4                             | 5.3                        | 191                          |
| Snow16       | 14.8                       | 43.9                         | RT5                             | 5.5                        | 241                          |
| Snow17       | 11.8                       | 27.6                         | RT6                             | 5.0                        | 199                          |
| Snow18       | 27.4                       | 80.9                         | RT7                             | 6.3                        | 128                          |
| Snow19       | 30.4                       | 122                          | RT8                             | 4.8                        | 287                          |
| Snow20       | 36.2                       | 162                          | RT9                             | 7.6                        | 229                          |
| Snow21       | 35.2                       | 202                          | RT10                            | 2.4                        | 82.8                         |
| Snow22       | -2.2                       | 0.4                          | RT11                            | 4.5                        | 96.0                         |
| Snow23       | 28.4                       | 77.0                         | RT12                            | 5.0                        | 93.1                         |
| Snow24       | 37.1                       | 127                          | RT13                            | 8.9                        | 189                          |
| Snow25       | 35.7                       | 171                          | RT14                            | 6.1                        | 119                          |
| Snow26       | -1.7                       | 0.7                          | RT15                            | 3.7                        | 135                          |

|                              |      |      |      |      |      |
|------------------------------|------|------|------|------|------|
| Snow27                       | 0.1  | 5.1  | RT16 | 5.0  | 63.4 |
| Snow28                       | 6.6  | 14.9 | RT17 | 4.6  | 73.8 |
| Snow29                       | 14.9 | 47.1 | RT18 | 6.0  | 93.8 |
| Snow30                       | 17.9 | 50.3 | RT19 | 8.4  | 121  |
| Snow31                       | 25.7 | 67.1 | RT20 | 2.6  | 62.2 |
| Snow32                       | 13.9 | 28.8 | RT21 | 5.5  | 158  |
| Snow33                       | -0.3 | 3.3  | RT22 | 5.0  | 171  |
| Snow34                       | 0.5  | 4.4  | RT23 | 4.6  | 101  |
| Snow35                       | 3.9  | 9.8  | RT24 | 2.1  | 42.4 |
| Snow36                       | 4.4  | 11.7 | RT25 | 3.0  | 49.7 |
| Snow37                       | 10.3 | 24.3 | RT26 | 5.9  | 103  |
| Snow38                       | 9.8  | 26.5 | RT27 | 0.3  | 325  |
| Snow39                       | 15.6 | 39.0 | RT28 | 1.1  | 258  |
| Snow40                       | 13.3 | 39.4 | RT29 | 2.4  | 36.1 |
| Snow41                       | 22.9 | 48.0 | RT30 | 2.2  | 263  |
| Snow42                       | 18.1 | 52.0 | RT31 | 1.3  | 105  |
| Snow43                       | 19.9 | 59.2 | RT32 | 2.0  | 85.1 |
| Snow44                       | 21.1 | 62.0 | RT33 | -3.3 | 30.2 |
| Snow45                       | -1.6 | 1.5  | RT34 | -0.3 | 133  |
| Snow46                       | 28.0 | 85.1 | RT35 | 7.1  | 201  |
| Snow47                       | 15.2 | 44.8 | RT36 | 2.1  | 295  |
| Snow48                       | 33.4 | 191  | RT37 | 0.2  | 183  |
| Snow49                       | 23.8 | 72.6 | RT38 | 2.8  | 237  |
| Snow50                       | 29.6 | 142  | RT39 | 3.4  | 137  |
| Snow51                       | -2.1 | 1.3  | RT40 | -1.7 | 53.5 |
| Snow52                       | 30.0 | 220  | RT41 | 2.4  | 79.4 |
| Snow53                       | 21.9 | 289  | RT42 | 1.4  | 39.2 |
| Snow54                       | 7.0  | 27.7 | RT43 | -0.6 | 24.9 |
| Snow55                       | 11.5 | 29.7 | RT44 | -2.3 | 35.2 |
| Snow56                       | 20.0 | 56.7 | RT45 | -0.3 | 63.8 |
| Snow57                       | 31.7 | 160  | RT46 | 1.3  | 55.8 |
| Snow58                       | 22.6 | 109  | RT47 | 1.1  | 48.0 |
| Snow59                       | 28.5 | 317  | RT48 | -0.9 | 42.6 |
| High alpine PM <sub>10</sub> |      |      | RT49 | -1.8 | 25.4 |
| SBK1                         | 0.1  | 8.3  | RT50 | -2.1 | 57.2 |
| SBK2                         | 0.8  | 6.0  | RT51 | 0.3  | 163  |
| SBK3                         | 0.5  | 3.5  | RT52 | 2.0  | 92.6 |
| SBK4                         | 0.6  | 6.4  | RT53 | 1.6  | 16.4 |
| SBK5                         | -0.7 | 4.2  | RT54 | 0.9  | 111  |
| SBK6                         | -2.5 | 1.1  | RT55 | 1.7  | 191  |
| SBK7                         | -1.2 | 4.6  | RT56 | 3.9  | 164  |

|                                          |      |      |      |      |      |
|------------------------------------------|------|------|------|------|------|
| SBK8                                     | -0.4 | 10.3 | RT57 | 3.5  | 179  |
| SBK9                                     | 8.1  | 15.9 | RT58 | -1.6 | 17.2 |
| SBK10                                    | 6.5  | 14.9 | RT59 | -0.2 | 45.3 |
| SBK11                                    | 6.4  | 21.1 | RT60 | -0.7 | 76.0 |
| SBK12                                    | 6.3  | 19.1 | RT61 | -0.8 | 69.1 |
| SBK13                                    | 8.6  | 32.2 | RT62 | 1.2  | 191  |
| SBK14                                    | 14.1 | 30.7 | RT63 | 0.5  | 151  |
| Reference Fe <sub>2</sub> O <sub>3</sub> |      |      | RT64 | 1.2  | 99.8 |
| Fe1                                      | -1.6 | 0.5  | RT65 | 0.0  | 130  |
| Fe2                                      | 12.9 | 12.3 | RT66 | -2.6 | 13.7 |
| Fe3                                      | 22.1 | 24.6 | RT67 | 2.6  | 77.1 |
| Fe4                                      | 34.6 | 38.7 | RT68 | 6.3  | 171  |
| Fe5                                      | 49.0 | 83.2 | RT69 | 1.5  | 167  |
| Fe6                                      | 58.2 | 130  | RT70 | -0.8 | 62.3 |
| Fe7                                      | 60.7 | 178  | RT71 | 0.5  | 18.0 |
| Fe8                                      | 55.6 | 235  | RT72 | 3.7  | 88.3 |
| Fe9                                      | 49.2 | 274  | RT73 | 1.0  | 177  |
| Fe10                                     | 38.2 | 314  | RT74 | 2.2  | 164  |
| Fe11                                     | 9.7  | 8.8  | RT75 | 1.7  | 173  |
| Fe12                                     | 17.8 | 19.0 | RT76 | 1.1  | 91.0 |
|                                          |      |      | RT77 | -0.8 | 81.0 |
|                                          |      |      | RT78 | -2.1 | 37.8 |
|                                          |      |      | RT79 | -3.9 | 7.8  |
